# Supplementary material for: Modulation of Ambient Temperature-Dependent Flowering in Arabidopsis thaliana by Natural Variation of FLOWERING LOCUS M
Source: PLoS Genet. 2015 Oct 22;11(10):e1005588. doi: 10.1371/journal.pgen.1005588 (PMC4619661; doi:10.1371/journal.pgen.1005588)
Supplement: S2 Table — (XLS) [file pgen.1005588.s013.xls]

## Sheet: S2 Table
S2 Table: List of genes that are annotated in the 31.3kb mapping interval. Note that only seven of eleven show transcript evidence in RNA-seq analysis.
Gene Identifier	Name	FoldChange (log2)	SE	p-value	Benjamini-Hochberg-adjusted p-values	p-value < 0.01 ?
AT1G77080	FLM	-3.06524	0.187669	1.50257e-69	6.10563e-67	yes
AT1G77090	-	-0.187307	0.116561	0.107839	0.318964	no
AT1G77110	PIN6	-0.00781085	0.28704	0.978201	0.9871	no
AT1G77120	ADH1	0.342576	0.191197	0.0726516	0.242995	no
AT1G77122	-	-0.230245	0.152345	0.129796	0.36063	no
AT1G77130	GUX3	-0.2052	0.111589	0.0656674	0.226753	no
AT1G77131	-	-0.341707	0.391737	0.38125	0.676396	no
