# Supplementary material for: Modulation of Ambient Temperature-Dependent Flowering in Arabidopsis thaliana by Natural Variation of FLOWERING LOCUS M
Source: PLoS Genet. 2015 Oct 22;11(10):e1005588. doi: 10.1371/journal.pgen.1005588 (PMC4619661; doi:10.1371/journal.pgen.1005588)
Supplement: S7 Table — (XLS) [file pgen.1005588.s018.xls]

## Sheet: S7 Table
S7 Table: List of primers used for cloning, genotyping, qRT, and sequencing.
No. or Name	Purpose	FW	REV	Source	Region
ULC-1	Cloning	GATGAAAACGTGTTTGGATTCT	-	this study
ULC-2	Cloning	-	AAATCTCAAAATTTTAACAATCTAAACATATTGTTTCTTATATGAAAAA	this study
ULC-3	Cloning	AGAAACAATATGTTTAGATTGTTAAAATTTTGAGATTTGGTAATT		this study
ULC-4	Cloning	-	AATATCTTATATAGTTTGGAGCTCT	this study
ULC-12	Cloning	CATATAAGAAACAATATGTTTAGGGCGCGCCAATTTTGAGATTTGGTAATTATA		this study
ULC-16	Cloning	GGCGCGCCATCGGATTACCAAAAACAAG	-	this study
FLM CDS	Genotyping	ATGGGAAGAAGAAAAATCGAG	TAATTGAGCAGCGGGAGAGT	Balasubramanian, 2006
GABI_vector	Genotyping	ATATTGACCATCATACTCATTGC	-
GABI-Kat 487H01	Genotyping	TGAAACTCTGATCATCTGGTGC	TGTCGTGGATATTTTTAACCCC
LINE-insertion (LP1, RP1)	Genotyping	TGGCCAAGATATGTTCTTGATG	TGTGTTAACCAATTTGAACCAA	this study
LINE-insertion (LP2)	Genotyping	ACAGCAACGCTCCGAGTAAAG	-	this study
RIKEN 13-4593-1	Genotyping	TTCATCAAGATTTTGTCTTTTGGA	TATCAACTTCGCAGGCCAAT
RIKEN Vector, 3-1a	Genotyping	-	GGTTCCCGTCCGATTTCGACT
SALK_068360	Genotyping	CACTTTGCATAGTGCCACTTTG	GCAGATGCGTAAGCTTTAACC
SALK_141971 (flm-3)	Genotyping	GAGCACCAGATGATCAGAGTTTC	TCATCCTCATCCAAATTCGAC
ACT8	qRT	GCAGCATGAAGATTAAGGTCGTGG	TGTGGACAATGCCTGGACCTGCT
FLC	qRT	GCTACTTGAACTTGTGGATAGCAA	GGAGAGGGCAGTCTCAAGGT
FLM beta	qRT	CTATGACTCTTCCTCCGGTGAC	GATCTAAGGCTCTAAGTTCATCAGCATG	modified from Lee, 2013 and Posé, 2013
FLM delta	qRT	CTATGACTCTTCCTCCGGTGAC	GCTTGAACAGCGCTTCTATC	modified from Lee, 2013 and Posé, 2013
FLM N-term (Exon1)	qRT	GCGAATCGAGAACAAAAGCA	GATGAGACCATTGCGTCGTT	this study
FLM C-term (Exon7)	qRT	TGCTGGCAACAGATGATGAG	AATTGAGCAGCGGGAGAGTC	this study
FT	qRT	GGTGGAGAAGACCTCAGGAA	GGTTGCTAGGACTTGGAACATC
MAF1.2	qRT	CCTCAATGTTTTGAACTCGATC	TCGACATTTGGTTCTTCAAGCTTGC	Severing, 2012
MAF1.4	qRT	GATCGTTATGAAATACAACATGC	GTATTCTTTCCCATCTGGCTAGC	Severing, 2012
SVP	qRT	ATGGCGAGAGAAAAGATTCAG	CTAACCACCATACGGTAAGCC	Posé, 2013
ULS-17	Sequencing	-	TGTGTTAACCAATTTGAACCAA	this study	LINE insertion
ULS-25	Sequencing	TTCAAGAAACTTTTCTACACGTGG	-	this study	LINE insertion
ULS-26	Sequencing	CCAGTTTATCTTCCCCACGGAA	-	this study	LINE insertion
ULS-27	Sequencing	GGAGACATTTCAGGAAGTGAGA	-	this study	LINE insertion
ULS-29	Sequencing	AAACCATCTTTGGGAACGGTTA	-		LINE insertion
ULS-23	Sequencing	-	CTTTACTCGGAGCGTTGCTGT	this study	LINE insertion
ULS-24	Sequencing	-	CATGTTTTGTGTAATGCCATCCC	this study	LINE insertion
ULS-28	Sequencing	-	TCTTTGCAGATCTCTTTCGTCA	this study	LINE insertion
ULS-30	Sequencing	-	TGAAGAAAAGAGAATCGTCCGC	this study	LINE insertion
ULS-31	Sequencing	-	CTCATTCCAAAAACGTTGGTAG	this study	LINE insertion
ULS-32	Sequencing	-	GGACTTGATTCTTGCTTCTGCA	this study	LINE insertion
ULS-51	Sequencing	-	CACGTTTGATTGTGCCATCGAA	this study	LINE insertion
ULS-20	Sequencing	AATTTGCCTCTTAGTGGCTTCA	-	this study	upstream/cds
ULS-22	Sequencing	ACCGGTCTAACCGACTGGAT	-	this study	upstream/cds
ULS-34	Sequencing	GCCAACCAATTTCCAACCTA	-	this study	upstream
ULS-33	Sequencing	TTAATCCGGTTAGGGTCGTG	-	this study	upstream
ULS-52	Sequencing	AGTGGTCAAGTTACTAATCACTTT	-	this study	upstream
ULS-3	Sequencing	TGAGAGATTATTTGGGGTTAGTGG	-	this study	cds
ULS-5	Sequencing	TGCTTGATCATGAAAGCAAA	-	this study	cds
ULS-7	Sequencing	TAATCGAACTCATGGGGATG	-	this study	cds
ULS-9	Sequencing	TCCAAAGGTTAGCAGTACGACA	-	this study	cds
ULS-11	Sequencing	GCCAGGTAACAATGACCACA	-	this study	cds
ULS-35	Sequencing	-	TCGATGACGATGAGTAAATGTTTACA	this study	Co-1 insertion
ULS-36	Sequencing	AGTCCCGGTGCTCACAAAGA	-	this study	Lö-1 insertion
ULS-37	Sequencing	-	ACATGCAATATTAAATTTCGTCACA	this study	Lö-1 insertion
ULS-38	Sequencing	TGCTACAATTGTGGGAAGTTTGG	-	this study	Lö-1 insertion
ULS-40	Sequencing	GCACAAAAACCGTTGGAGCT	-	this study	Lö-1 insertion
ULS-41	Sequencing	AGTGAAAGGACTCCGCGTTT	-	this study	Lö-1 insertion
ULS-42	Sequencing	CAAGAAGGCTATGCTAAGGAGGT	-	this study	Lö-1 insertion
ULS-43	Sequencing	TGGCCAAATCCAAGTTCTAGAG	-	this study	Lö-1 insertion
ULS-44	Sequencing	ACCTCTAAAAGAATTTTACTCT	-	this study	Lö-1 insertion
